# Supplementary material
Source: PubMed Central journal article supplement (PMC4679658)

A.

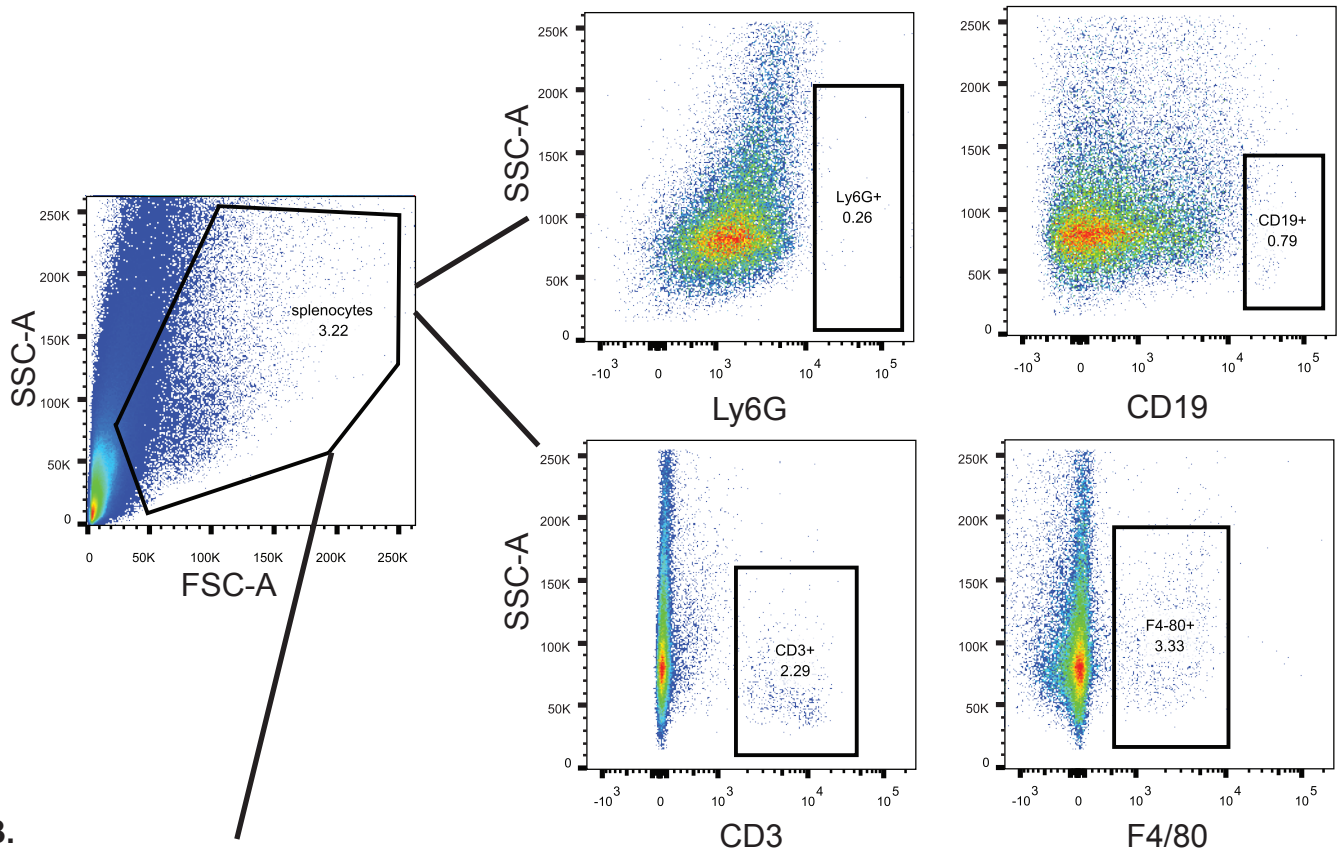

B.

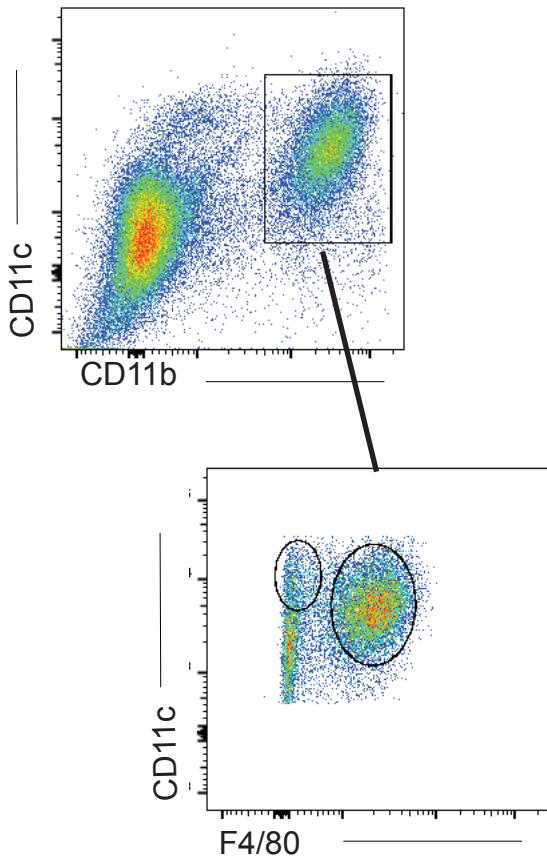

C.

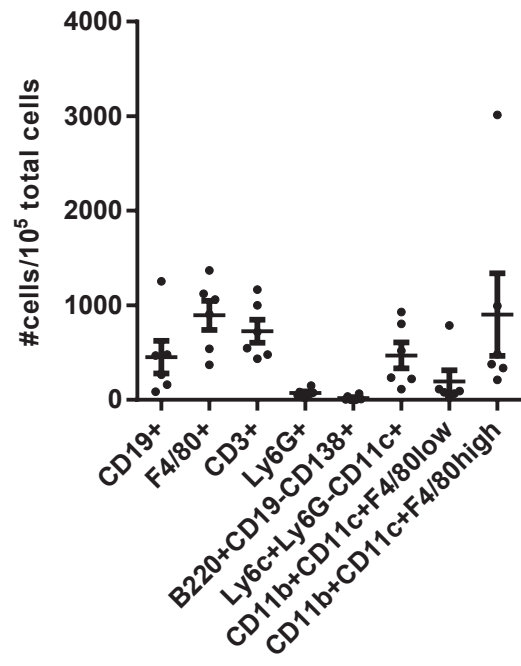

Supplement: NIHMS717965-supplement.pdf [file NIHMS717965-supplement.pdf]
